# Supplementary material
Source: publisher site journal article supplement (https://www.dovepress.com/article/472849)
Supplement: Supplementary file 1 [file get_supplementary_file.php]

**Supplementary**

**Supplementary table 1.** The table presents the exposure and outcome alongside with the potential risk factors and exclusion diagnosis.

Diagnoses and medicine use were identified by the presented ICD-10 and ATC-codes.

|  | **ICD-10** | **ATC** |
| --- | --- | --- |
| **Exposure/event** |  |  |
| Contact to emergency department with trauma due to falling  Head and facial trauma | S00-S05, S060, S07-S09 |  |
| **Outcome** |  |  |
| CSDH-operation | KAAD10 |  |
| **Risk factors** |  |  |
| Cerebral insult | I630-9 |  |
| Antihypertensive treatment |  | C03, C07, C08, C09A, C09B, C09C, C09D |
| Diabetes mellitus |  | A10 |
| Alcohol addiction | F10, G31.2, G62.1, G72.1, I42.6, K29.2, K70, K85.2, K86.0, L27.8A, Z72.1 | N07BB |
| Renal insufficiency | N17-N19 |  |
| Chronic hepatic disease | K70-K77 |  |
| Anticoagulative treatment |  | B01A |
| Non steroid anti-inflammatory drugs |  | M01A |
| Lipid modifying drugs |  | C10 |
| Glucocorticoids |  | H02AB |
| Conditions predisposing for head trauma | DR20-29 |  |
| Disposing neurological disorders | DG1-9 |  |
| Autoimmune disorders |  |  |
| - Hepatitis | DK754, DK732A-G |  |
| - Thyroiditis | DE063 |  |
| - Haemolytic anaemia | DD590-1 |  |
| - Pancreatitis | DK861F |  |
| - Adrenalitis | DE271B |  |
| - Polyglandular insufficiency | DE310 |  |
| Intracranial bleeding at trauma | DS061, DS062, DS063, DS064, DS065B, DS066, DS067, DS068, DS069 |  |
| **Censoring/Exclusion diagnosis** |  |  |
| Intracranial tumour | C70  C71  D32.0  D33.0-2 |  |
| Arteriovenous malformation  Spontaneous intracranial haemorrhage | Q28.0-2  DI60-9 |  |

**Supplementary table 2.** Anatomical therapeutic chemical classification (ATC) codes of the medicine included in

the study and the daily doses (DD), package size, and washout period.

| ATC | Name | DD | Package size | Washout period |
| --- | --- | --- | --- | --- |
| B01AA03 | Warfarin | Specific** |  |  |
| B01AC06 | Acetylsalicylic acid | Specific* |  |  |
| B01AC04 | Clopidogrel | Specific* |  |  |
| B01AE07 | Dabigatranetexilat | Any | 180 | 198 days |
| B01AF01 | Rivaroxaban | Any | 98, 100, 196 | 215 days |
| B01AF02 | Apixaban | Any | 100, 168, 200 | 220 days |
| B01AF03 | Edoxaban | Any | 90, 98, 100 | 110 days |
| H02AB | Glucocorticoids | Any | Packages of ≥ 100 | 120 days |
| M01AB05 | Diclofenac | 200 mg | Packages of ≥ 100 |  |
| M01AB08 | Etodolac | 600 mg | Packages of ≥ 60 |  |
| M01AE01 | Ibuprofen | Specific *** | Packages of ≥ 100 |  |
| M01AE02 | Naproxen | 1000 mg | Packages of ≥ 100 |  |

Cohort members were no longer considered current users when no refill was made within the treatment period of the latest prescription plus a number of days corresponding to 10% of the treatment period.

*For acetylsalicylic acid and clopidogrel, the treatment period was determined based on the prescribed number of standard dosages. The standard dosage of acetylsalicylic acid for cardiovascular indications is either 75 mg or 150 mg, and regardless of strength we assumed that one tablet corresponded to one day of treatment. For clopidogrel the standard dosage is 75 mg with one tablet corresponding to one day of treatment.

**For warfarin, there is no standard dosage and patients are treated according to their INR (International Normalized Ratio). The daily dosage differs between 2.5 mg and 10 mg and some patients have single days with no tablet intake. To calculate treatment period for warfarin use we therefore assumed an average daily intake of 5 mg.

The platelet inhibiting side effect of NSAID’s has a duration crudely comparable to that of platelet inhibitors.

***For ibuprofen, we calculated the daily dosages from the strengths of the tablets and the standard dosages recommended for chronic users. For instance, we assumed a daily intake of 1800 mg of ibuprofen if 600 mg tablets were prescribed.

**Supplementary methods**

Chronic and time-dependent medication

NSAIDs, glucocorticoids, anticoagulant treatment and conditions predisposing for head trauma were included as time dependent variables. Anticoagulant treatment was divided into warfarin, acetylsalicylic acid, clopidogrel, dabigatranetexilat, rivaroxaban, apixaban and edoxaban with lookback period dependent on packages size.

Chronic conditions included cerebral infarction, hypertension, diabetes mellitus, alcohol addiction, renal insufficiency, chronic hepatic disease, autoimmune disorders and disposing neurological conditions. Chronic prescribed medicines included lipid-modifying drugs and antihypertensive treatment.

Cohort members were considered treated with anticoagulation medicine if they had filled prescriptions for platelet inhibitors (clopidogrel and acetylsalicylic acid) or vitamin-K antagonists (warfarin). Use of anticoagulation medicine was considered as a time-dependent variable indicating current use. (i.e., those cohort members who experienced a recurrent bleeding were only considered exposed if they were current users at the time of the recurrent bleeding). Current use was at any time during follow-up based on the treatment period of the last refill (restricted to a maximum of 365 days) to avoid accumulation of tablets and thus an overestimation of the exposure time. Cohort members were no longer considered current users when no refill was made within the treatment period of the latest prescription plus a number of days corresponding to 10% of the treatment period.

**Supplementary figure 1.** Hazard ratios (HR) with 95% confidence intervals displaying the risk of CSDH when comparing individuals exposed to pro-inflammatory conditions to unexposed individuals, according to age (years) for individuals with registered head trauma. In renal insufficiency the age group 50-65 years with registered head trauma is not represented due to few patients.


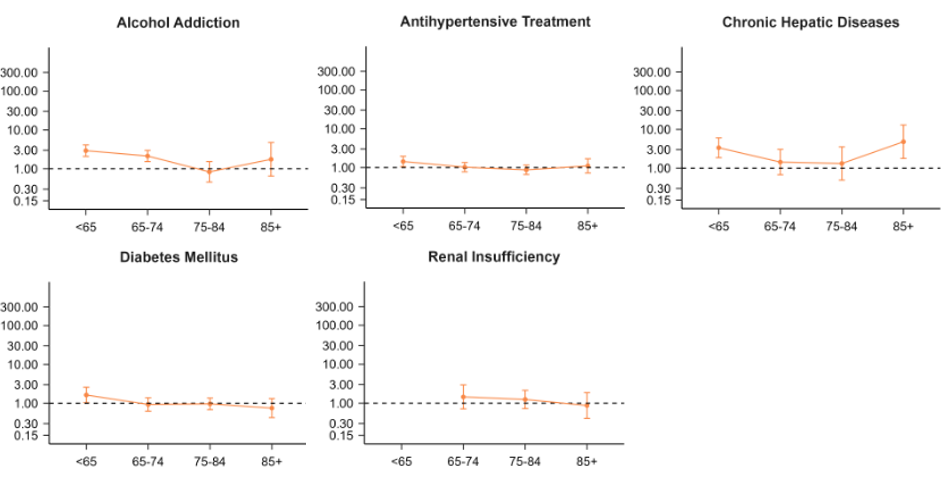


**Supplementary figure 2.** Hazard ratios (HR) with 95% confidence intervals displaying the risk of CSDH when comparing individuals exposed to anti-inflammatory medication to unexposed individuals, according to age (years) for individuals with registered head trauma.

**
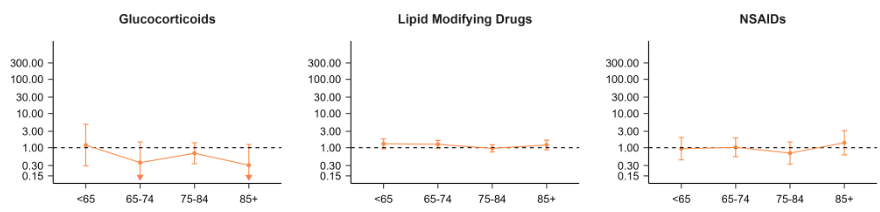
**

**Supplementary table 3.** Hazard ratios for Chronic Subdural Haematoma (CSDH) for all risk factors included in the study divided into age groups.

| Risk factor | Head trauma | Exposed to risk factor | Age | Number of events | PYRS | HR (95% CI) |
| --- | --- | --- | --- | --- | --- | --- |
| Cerebral infarction | Unexposed | no | 50 to 65 | 528 | 28528.87 | 1 (ref) |
| yes | 19 | 237.12 | 3.33 (2.1-5.28) |
| no | 65 to 75 | 944 | 16073.66 | 1 (ref) |
| yes | 55 | 310.5 | 2.35 (1.79-3.1) |
| no | 75 to 85 | 1073 | 8481.58 | 1 (ref) |
| yes | 70 | 289.78 | 1.59 (1.24-2.03) |
| no | 85 to 150 | 546 | 3127.69 | 1 (ref) |
| yes | 39 | 142.57 | 1.34 (0.97-1.86) |
| Exposed | no | 50 to 65 | 160 | 525.67 | 1 (ref) |
| yes | <5 | 5.52 | 1.92 (0.71-5.18) |
| no | 65 to 75 | 217 | 305.98 | 1 (ref) |
| yes | <5 | 6.78 | 0.5 (0.16-1.55) |
| no | 75 to 85 | 255 | 248.43 | 1 (ref) |
| yes | 11 | 8.54 | 1.04 (0.57-1.9) |
| no | 85 to 150 | 155 | 183.91 | 1 (ref) |
| yes | 7 | 6.74 | 1 (0.47-2.15) |
| Antihypertensive treatment | Unexposed | no | 50 to 65 | 263 | 18704.9 | 1 (ref) |
| yes | 284 | 10061.09 | 1.77 (1.49-2.09) |
| no | 65 to 75 | 326 | 7038.1 | 1 (ref) |
| yes | 673 | 9346.06 | 1.42 (1.25-1.63) |
| no | 75 to 85 | 253 | 2362.32 | 1 (ref) |
| yes | 890 | 6409.03 | 1.26 (1.09-1.45) |
| no | 85 to 150 | 110 | 596.72 | 1 (ref) |
| yes | 475 | 2673.54 | 0.99 (0.8-1.21) |
| Exposed | no | 50 to 65 | 82 | 323.71 | 1 (ref) |
| yes |  | 82 | 207.49 | 1.43 (1.05-1.95) |
| no | 65 to 75 | 80 | 120.17 | 1 (ref) |
| yes |  | 140 | 192.59 | 1.02 (0.78-1.35) |
| no | 75 to 85 | 66 | 58.28 | 1 (ref) |
| yes |  | 200 | 198.69 | 0.87 (0.66-1.16) |
| no | 85 to 150 | 26 | 32.21 | 1 (ref) |
| yes |  | 136 | 158.44 | 1.1 (0.72-1.68) |
| Diabetes Mellitus | Unexposed | no | 50 to 65 | 491 | 27058.37 | 1 (ref) |
| yes |  | 56 | 1707.62 | 1.42 (1.08-1.88) |
| no | 65 to 75 | 838 | 14664.29 | 1 (ref) |
| yes |  | 161 | 1719.87 | 1.38 (1.17-1.64) |
| no | 75 to 85 | 972 | 7705.85 | 1 (ref) |
| yes |  | 171 | 1065.5 | 1.13 (0.96-1.33) |
| no | 85 to 150 | 514 | 2951.1 | 1 (ref) |
| yes |  | 71 | 319.15 | 1.13 (0.88-1.45) |
| Exposed | no | 50 to 65 | 143 | 494.71 | 1 (ref) |
| yes |  | 21 | 36.48 | 1.63 (1.03-2.58) |
| no | 65 to 75 | 192 | 276.15 | 1 (ref) |
| yes |  | 28 | 36.61 | 0.93 (0.63-1.39) |
| no | 75 to 85 | 229 | 223.9 | 1 (ref) |
| yes |  | 37 | 33.07 | 0.97 (0.68-1.37) |
| no | 85 to 150 | 149 | 173.21 | 1 (ref) |
| yes |  | 13 | 17.44 | 0.75 (0.43-1.33) |
| Alcohol addiction | Unexposed | no | 50 to 65 | 465 | 27818.31 | 1 (ref) |
| yes |  | 82 | 947.68 | 4.51 (3.53-5.77) |
| no | 65 to 75 | 935 | 15952.65 | 1 (ref) |
| yes |  | 64 | 431.51 | 2.11 (1.63-2.72) |
| no | 75 to 85 | 1109 | 8640.61 | 1 (ref) |
| yes |  | 34 | 130.74 | 1.64 (1.17-2.32) |
| no | 85 to 150 | 577 | 3251.53 | 1 (ref) |
| yes |  | 8 | 18.72 | 1.78 (0.88-3.58) |
| Exposed | no | 50 to 65 | 115 | 471.74 | 1 (ref) |
| yes |  | 49 | 59.45 | 2.93 (2.09-4.11) |
| no | 65 to 75 | 176 | 285.72 | 1 (ref) |
| yes |  | 44 | 27.04 | 2.14 (1.53-2.98) |
| no | 75 to 85 | 255 | 247.21 | 1 (ref) |
| yes |  | 11 | 9.76 | 0.84 (0.46-1.53) |
| no | 85 to 150 | 158 | 188.75 | 1 (ref) |
| yes |  | <5 | 1.9 | 1.75 (0.65-4.76) |
| Renal insufficiency | Unexposed | no | 50 to 65 | 537 | 28609.22 | 1 (ref) |
| yes |  | 10 | 156.77 | 2.66 (1.42-4.99) |
| no | 65 to 75 | 967 | 16167.71 | 1 (ref) |
| yes |  | 32 | 216.45 | 1.9 (1.33-2.72) |
| no | 75 to 85 | 1084 | 8543.75 | 1 (ref) |
| yes |  | 59 | 227.6 | 1.59 (1.22-2.07) |
| no | 85 to 150 | 547 | 3161.79 | 1 (ref) |
| yes |  | 38 | 108.46 | 1.51 (1.09-2.11) |
| Exposed | no | 50 to 65 | 164 | 526.72 | 1 (ref) |
| yes |  | NA | 4.47 | 0 (0-0) |
| no | 65 to 75 | 212 | 306.5 | 1 (ref) |
| yes |  | 8 | 6.26 | 1.45 (0.71-2.93) |
| no | 75 to 85 | 252 | 248.43 | 1 (ref) |
| yes |  | 14 | 8.54 | 1.24 (0.73-2.14) |
| no | 85 to 150 | 155 | 183.83 | 1 (ref) |
| yes |  | 7 | 6.82 | 0.87 (0.41-1.86) |
| Chronic hepatic diseases | Unexposed | no | 50 to 65 | 522 | 28548.02 | 1 (ref) |
| yes |  | 25 | 217.97 | 5.91 (3.95-8.86) |
| no | 65 to 75 | 975 | 16239.64 | 1 (ref) |
| yes |  | 24 | 144.52 | 2.68 (1.78-4.02) |
| no | 75 to 85 | 1136 | 8711.88 | 1 (ref) |
| yes |  | 7 | 59.47 | 0.88 (0.42-1.86) |
| no | 85 to 150 | 583 | 3255.9 | 1 (ref) |
| yes |  | <5 | 14.35 | 0.69 (0.17-2.78) |
| Exposed | no | 50 to 65 | 152 | 520.11 | 1 (ref) |
| yes |  | 12 | 11.08 | 3.35 (1.86-6.05) |
| no | 65 to 75 | 213 | 306.37 | 1 (ref) |
| yes |  | 7 | 6.39 | 1.43 (0.67-3.04) |
| no | 75 to 85 | 262 | 254.27 | 1 (ref) |
| yes |  | <5 | 2.7 | 1.32 (0.49-3.53) |
| no | 85 to 150 | 158 | 189.71 | 1 (ref) |
| yes |  | <5 | 0.94 | 4.79 (1.78-12.89) |
| Lipid modifying drugs | Unexposed | no | 50 to 65 | 381 | 22976.22 | 1 (ref) |
| yes |  | 166 | 5789.77 | 1.38 (1.15-1.66) |
| no | 65 to 75 | 538 | 10017.01 | 1 (ref) |
| yes |  | 461 | 6367.14 | 1.19 (1.05-1.35) |
| no | 75 to 85 | 584 | 4840.26 | 1 (ref) |
| yes |  | 559 | 3931.09 | 1.08 (0.96-1.21) |
| no | 85 to 150 | 356 | 2199.38 | 1 (ref) |
| yes |  | 229 | 1070.87 | 1.11 (0.93-1.31) |
| Exposed | no | 50 to 65 | 115 | 415.4 | 1 (ref) |
| yes |  | 49 | 115.79 | 1.3 (0.93-1.81) |
| no | 65 to 75 | 115 | 187.77 | 1 (ref) |
| yes |  | 105 | 124.99 | 1.26 (0.96-1.64) |
| no | 75 to 85 | 147 | 144.35 | 1 (ref) |
| yes |  | 119 | 112.62 | 0.95 (0.75-1.22) |
| no | 85 to 150 | 103 | 137.28 | 1 (ref) |
| yes |  | 59 | 53.37 | 1.2 (0.87-1.66) |
| Disposing neurological disorders | Unexposed | no | 50 to 65 | 417 | 26128.79 | 1 (ref) |
| yes |  | 130 | 2637.2 | 3.09 (2.52-3.78) |
| no | 65 to 75 | 764 | 14703.74 | 1 (ref) |
| yes |  | 235 | 1680.42 | 2.38 (2.04-2.76) |
| no | 75 to 85 | 872 | 7738.4 | 1 (ref) |
| yes |  | 271 | 1032.95 | 2.09 (1.81-2.4) |
| no | 85 to 150 | 462 | 2890.2 | 1 (ref) |
| yes |  | 123 | 380.06 | 1.8 (1.47-2.21) |
| Exposed | no | 50 to 65 | 101 | 457.94 | 1 (ref) |
| yes |  | 63 | 73.25 | 3.88 (2.83-5.33) |
| no | 65 to 75 | 171 | 263.71 | 1 (ref) |
| yes |  | 49 | 49.05 | 1.36 (0.99-1.87) |
| no | 75 to 85 | 187 | 212.23 | 1 (ref) |
| yes |  | 79 | 44.74 | 1.77 (1.36-2.31) |
| no | 85 to 150 | 135 | 163.55 | 1 (ref) |
| yes |  | 27 | 27.1 | 1.03 (0.68-1.56) |
| Autoimmune disorders | Unexposed | no | 50 to 65 | 545 | 28715.89 | 1 (ref) |
| yes |  | <5 | 50.1 | 2.95 (0.73-11.88) |
| no | 65 to 75 | 996 | 16354.22 | 1 (ref) |
| yes |  | <5 | 29.94 | 2.06 (0.66-6.39) |
| no | 75 to 85 | 1143 | 8755.35 | 1 (ref) |
| yes |  | NA | 16 | 0 (0-0) |
| no | 85 to 150 | 585 | 3265.92 | 1 (ref) |
| yes |  | NA | 4.33 | 0 (0-0) |
| Exposed | no | 50 to 65 | 164 | 530.22 | 1 (ref) |
| yes |  | NA | 0.98 | 0 (0-0) |
| no | 65 to 75 | 220 | 312.09 | 1 (ref) |
| yes |  | NA | 0.67 | 0 (0-0) |
| no | 75 to 85 | 265 | 256.41 | 1 (ref) |
| yes |  | <5 | 0.56 | 1.99 (0.28-14.27) |
| no | 85 to 150 | 162 | 190.35 | 1 (ref) |
| yes |  | NA | 0.3 | 0 (0-0) |
| Anticoagulation | Unexposed | no | 50 to 65 | 398 | 25895.84 | 1 (ref) |
| yes |  | 149 | 2870.15 | 2.44 (2.01-2.98) |
| no | 65 to 75 | 554 | 12245.23 | 1 (ref) |
| yes |  | 445 | 4138.93 | 1.93 (1.7-2.19) |
| no | 75 to 85 | 504 | 5315.64 | 1 (ref) |
| yes |  | 639 | 3455.72 | 1.67 (1.48-1.87) |
| no | 85 to 150 | 265 | 1855.72 | 1 (ref) |
| yes |  | 320 | 1414.53 | 1.38 (1.17-1.62) |
| Exposed | no | 50 to 65 | 135 | 465.1 | 1 (ref) |
| yes |  | 29 | 66.09 | 1.16 (0.78-1.73) |
| no | 65 to 75 | 129 | 221.19 | 1 (ref) |
| yes |  | 91 | 91.57 | 1.4 (1.07-1.84) |
| no | 75 to 85 | 135 | 144.01 | 1 (ref) |
| yes |  | 131 | 112.96 | 1.06 (0.83-1.35) |
| no | 85 to 150 | 86 | 104.01 | 1 (ref) |
| yes |  | 76 | 86.64 | 0.92 (0.68-1.25) |
| Glucocorticoids | Unexposed | no | 50 to 65 | 539 | 28557.8 | 1 (ref) |
| yes |  | 8 | 208.19 | 1.89 (0.94-3.79) |
| no | 65 to 75 | 987 | 16098.83 | 1 (ref) |
| yes |  | 12 | 285.33 | 0.68 (0.39-1.21) |
| no | 75 to 85 | 1125 | 8479.8 | 1 (ref) |
| yes |  | 18 | 291.55 | 0.48 (0.3-0.76) |
| no | 85 to 150 | 574 | 3158.95 | 1 (ref) |
| yes |  | 11 | 111.3 | 0.54 (0.3-0.98) |
| Exposed | no | 50 to 65 | 162 | 525.76 | 1 (ref) |
| yes |  | <5 | 5.43 | 1.19 (0.29-4.8) |
| no | 65 to 75 | 218 | 304.8 | 1 (ref) |
| yes |  | <5 | 7.96 | 0.37 (0.09-1.48) |
| no | 75 to 85 | 258 | 245.51 | 1 (ref) |
| yes |  | 8 | 11.46 | 0.69 (0.34-1.39) |
| no | 85 to 150 | 160 | 183.42 | 1 (ref) |
| yes |  | <5 | 7.23 | 0.31 (0.08-1.24) |
| Conditions predisposing for head trauma | Unexposed | no | 50 to 65 | 514 | 28629.58 | 1 (ref) |
| yes |  | 33 | 136.41 | 13.21 (9.28-18.79) |
| no | 65 to 75 | 932 | 16273.37 | 1 (ref) |
| yes |  | 67 | 110.79 | 9.57 (7.47-12.27) |
| no | 75 to 85 | 1050 | 8658.26 | 1 (ref) |
| yes |  | 93 | 113.09 | 6.47 (5.23-8.01) |
| no | 85 to 150 | 518 | 3192.65 | 1 (ref) |
| yes |  | 67 | 77.6 | 5.3 (4.1-6.85) |
| Exposed | no | 50 to 65 | 152 | 523.15 | 1 (ref) |
| yes |  | 12 | 8.04 | 4.67 (2.59-8.42) |
| no | 65 to 75 | 198 | 303.37 | 1 (ref) |
| yes |  | 22 | 9.39 | 3.26 (2.1-5.06) |
| no | 75 to 85 | 221 | 241.36 | 1 (ref) |
| yes |  | 45 | 15.61 | 3.02 (2.19-4.16) |
| no | 85 to 150 | 134 | 172.67 | 1 (ref) |
| yes |  | 28 | 17.98 | 1.95 (1.3-2.93) |
| NSAID’s | Unexposed | no | 50 to 65 | 511 | 27735.97 | 1 (ref) |
| yes |  | 36 | 1030.02 | 1.94 (1.39-2.73) |
| no | 65 to 75 | 956 | 15787.9 | 1 (ref) |
| yes |  | 43 | 596.26 | 1.25 (0.92-1.69) |
| no | 75 to 85 | 1111 | 8477.27 | 1 (ref) |
| yes |  | 32 | 294.08 | 0.89 (0.63-1.27) |
| no | 85 to 150 | 566 | 3186.69 | 1 (ref) |
| yes |  | 19 | 83.56 | 1.34 (0.85-2.12) |
| Exposed | no | 50 to 65 | 157 | 505.99 | 1 (ref) |
| yes |  | 7 | 25.21 | 0.94 (0.44-2) |
| no | 65 to 75 | 210 | 297.67 | 1 (ref) |
| yes |  | 10 | 15.09 | 1.02 (0.54-1.93) |
| no | 75 to 85 | 259 | 246.59 | 1 (ref) |
| yes |  | 7 | 10.38 | 0.7 (0.33-1.47) |
| no | 85 to 150 | 156 | 185.34 | 1 (ref) |
| yes |  | 6 | 5.31 | 1.39 (0.62-3.15) |
| Traumatic_intracranial_haemorrhage | Unexposed | no | 50 to 65 | 497 | 28737.7 | 1 (ref) |
| yes |  | 50 | 28.29 | 91.8 (67.78-124.34) |
| no | 65 to 75 | 925 | 16365.27 | 1 (ref) |
| yes |  | 74 | 18.88 | 57.77 (45.14-73.92) |
| no | 75 to 85 | 1033 | 8758.33 | 1 (ref) |
| yes |  | 110 | 13.02 | 61.79 (50.04-76.29) |
| no | 85 to 150 | 531 | 3263.56 | 1 (ref) |
| yes |  | 54 | 6.7 | 46.23 (34.33-62.27) |
| Exposed | no | 50 to 65 | 122 | 526.63 | 1 (ref) |
| yes |  | 42 | 4.56 | 34.33 (23.95-49.21) |
| no | 65 to 75 | 165 | 309.83 | 1 (ref) |
| yes |  | 55 | 2.93 | 27.85 (20.29-38.24) |
| no | 75 to 85 | 222 | 254.81 | 1 (ref) |
| yes |  | 44 | 2.16 | 19.44 (13.88-27.22) |
| no | 85 to 150 | 140 | 189.19 | 1 (ref) |
| yes |  | 22 | 1.47 | 17.07 (10.69-27.26) |
| Acute subdural haematoma | Unexposed | no | 50 to 65 | 521 | 28763.82 | 1 (ref) |
| yes |  | 26 | 2.17 | 517.6 (334.73-800.36) |
| no | 65 to 75 | 953 | 16381.97 | 1 (ref) |
| yes |  | 46 | 2.18 | 287.44 (205.8-401.48) |
| no | 75 to 85 | 1065 | 8769.5 | 1 (ref) |
| yes |  | 78 | 1.85 | 278.46 (209.87-369.47) |
| no | 85 to 150 | 551 | 3269.21 | 1 (ref) |
| yes |  | 34 | 1.05 | 155.15 (103.42-232.76) |
| Exposed | no | 50 to 65 | 148 | 530.67 | 1 (ref) |
| yes |  | 16 | 0.53 | 89.48 (51.31-156.06) |
| no | 65 to 75 | 201 | 312.36 | 1 (ref) |
| yes |  | 19 | 0.4 | 54.65 (32.64-91.51) |
| no | 75 to 85 | 255 | 256.67 | 1 (ref) |
| yes |  | 11 | 0.3 | 30 (15.79-57) |
| no | 85 to 150 | 146 | 190.4 | 1 (ref) |
| yes |  | 16 | 0.25 | 65.9 (37.01-117.35) |

Reference for comparison is unexposed individuals. PYRS: patient years. NSAID’s: non-steroid anti-inflammatory drugs

**Supplementary figure 3.** Hazard ratios (HR) with 95% confidence intervals displaying the risk of CSDH among individuals exposed to conditions predisposing for head trauma, acute subdural hematoma, traumatic intracranial haemorrhage or anticoagulative medications as compared with unexposed individuals, according to age (years) for individuals with registered head trauma.


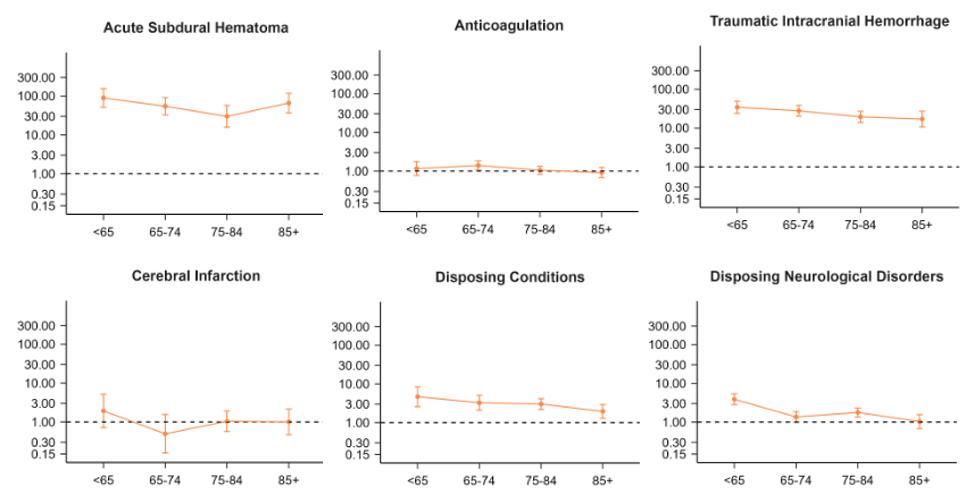


**Supplementary figure 4.**

Hazard ratios (HR) with 95% confidence intervals displaying the risk of CSDH among individuals exposed to conditions predisposing for head trauma, acute subdural hematoma, traumatic intracranial haemorrhage, or anticoagulative medications as compared with unexposed individuals, according to age (years) for individuals without registered with head trauma.


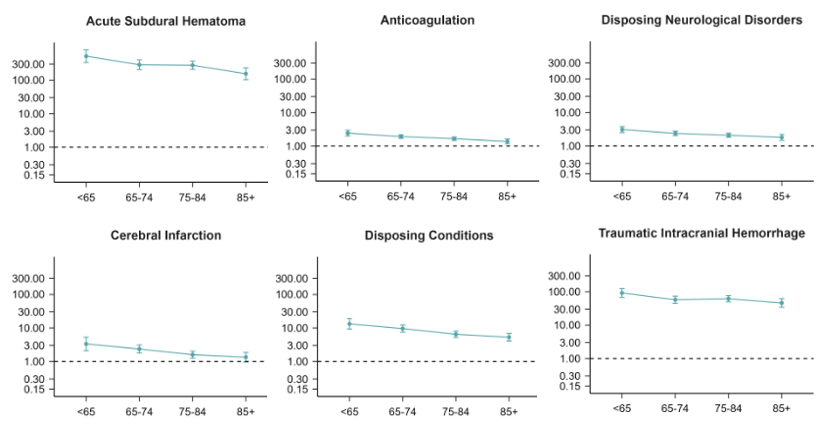


**Supplementary table 4.** Hazard ratios for Chronic Subdural Haematoma (CSDH) for all risk factors included in the study, according

to the temporal exposure for head trauma (< 90 days and ≥ 90 days, respectively).

| Risk factor | Exposed to risk factor | Age | Head trauma | Number of events | PYRS | HR (95% CI) |
| --- | --- | --- | --- | --- | --- | --- |
| Cerebral infarction | no | 50 to 65 | Unexposed | 528 | 28528.87 | 1 (ref) |
| yes |  | 19 | 237.12 | 3.38 (2.13-5.36) |
| no | 65 to 75 | 944 | 16073.66 | 1 (ref) |
| yes |  | 55 | 310.5 | 2.39 (1.82-3.15) |
| no | 75 to 85 | 1073 | 8481.58 | 1 (ref) |
| yes |  | 70 | 289.78 | 1.61 (1.26-2.06) |
| no | 85 to 150 | 546 | 3127.69 | 1 (ref) |
| yes |  | 39 | 142.57 | 1.36 (0.98-1.88) |
| no | 50 to 65 | exposed: < 90 days | 100 | 145.28 | 1 (ref) |
| yes |  | <5 | 1.9 | 0.61 (0.09-4.4) |
| no | 65 to 75 | 169 | 99.29 | 1 (ref) |
| yes |  | <5 | 2.85 | 0.5 (0.16-1.56) |
| no | 75 to 85 | 205 | 81.12 | 1 (ref) |
| yes |  | <11 | 3.56 | 0.76 (0.37-1.54) |
| no | 85 to 150 | 117 | 57.2 | 1 (ref) |
| yes |  | <7 | 2.71 | 0.88 (0.39-2.02) |
| no | 50 to 65 | exposed: ≥ 90 days | 60 | 380.39 | 1 (ref) |
| yes |  | <5 | 3.62 | 4.37 (1.37-13.91) |
| no | 65 to 75 | 48 | 206.69 | 1 (ref) |
| yes |  | 0 | 3.93 | 0 (0-0) |
| no | 75 to 85 | 50 | 167.31 | 1 (ref) |
| yes |  | <11 | 4.98 | 1.71 (0.53-5.47) |
| no | 85 to 150 | 38 | 126.72 | 1 (ref) |
| yes |  | <7 | 4.03 | 0.7 (0.1-5.1) |
| Antihypertensive treatment | no | 50 to 65 | unexposed | 263 | 18704.9 | 1 (ref) |
| yes |  | 284 | 10061.09 | 1.78 (1.5-2.11) |
| no | 65 to 75 | 326 | 7038.1 | 1 (ref) |
| yes |  | 673 | 9346.06 | 1.43 (1.25-1.64) |
| no | 75 to 85 | 253 | 2362.32 | 1 (ref) |
| yes |  | 890 | 6409.03 | 1.27 (1.1-1.46) |
| no | 85 to 150 | 110 | 596.72 | 1 (ref) |
| yes |  | 475 | 2673.54 | 0.99 (0.81-1.22) |
| no | 50 to 65 | exposed: < 90 days | 50 | 88.96 | 1 (ref) |
| yes |  | 51 | 58.22 | 1.42 (0.96-2.1) |
| no | 65 to 75 | 65 | 38.62 | 1 (ref) |
| yes |  | 107 | 63.53 | 0.93 (0.68-1.26) |
| no | 75 to 85 | 52 | 19.05 | 1 (ref) |
| yes |  | 161 | 65.62 | 0.87 (0.64-1.19) |
| no | 85 to 150 | 16 | 9.84 | 1 (ref) |
| yes |  | 107 | 50.06 | 1.32 (0.78-2.24) |
| no | 50 to 65 | exposed: ≥ 90 days | 32 | 234.74 | 1 (ref) |
| yes |  | 31 | 149.27 | 1.41 (0.86-2.32) |
| no | 65 to 75 | 15 | 81.55 | 1 (ref) |
| yes |  | 33 | 129.07 | 1.32 (0.72-2.44) |
| no | 75 to 85 | 14 | 39.22 | 1 (ref) |
| yes |  | 39 | 133.07 | 0.82 (0.44-1.51) |
| no | 85 to 150 | 10 | 22.37 | 1 (ref) |
| yes |  | 29 | 108.38 | 0.64 (0.31-1.3) |
| Diabetes Mellitus | no | 50 to 65 | unexposed | 491 | 27058.37 | 1 (ref) |
| yes |  | 56 | 1707.62 | 1.43 (1.08-1.89) |
| no | 65 to 75 | 838 | 14664.29 | 1 (ref) |
| yes |  | 161 | 1719.87 | 1.39 (1.17-1.65) |
| no | 75 to 85 | 972 | 7705.85 | 1 (ref) |
| yes |  | 171 | 1065.5 | 1.14 (0.97-1.34) |
| no | 85 to 150 | 514 | 2951.1 | 1 (ref) |
| yes |  | 71 | 319.15 | 1.14 (0.89-1.46) |
| no | 50 to 65 | exposed: < 90 days | 89 | 136.74 | 1 (ref) |
| yes |  | 12 | 10.44 | 1.44 (0.79-2.63) |
| no | 65 to 75 | 150 | 89.75 | 1 (ref) |
| yes |  | 22 | 12.4 | 0.91 (0.58-1.42) |
| no | 75 to 85 | 184 | 73.25 | 1 (ref) |
| yes |  | 29 | 11.42 | 0.9 (0.61-1.33) |
| no | 85 to 150 | 116 | 54.14 | 1 (ref) |
| yes |  | 7 | 5.76 | 0.49 (0.23-1.05) |
| no | 50 to 65 | exposed: ≥ 90 days | 54 | 357.98 | 1 (ref) |
| yes |  | 9 | 26.03 | 1.9 (0.94-3.85) |
| no | 65 to 75 | 42 | 186.4 | 1 (ref) |
| yes |  | 6 | 24.22 | 0.93 (0.4-2.2) |
| no | 75 to 85 | 45 | 150.64 | 1 (ref) |
| yes |  | 8 | 21.65 | 1.1 (0.52-2.33) |
| no | 85 to 150 | 33 | 119.07 | 1 (ref) |
| yes |  | 6 | 11.68 | 1.63 (0.68-3.9) |
| Alcohol addiction | no | 50 to 65 | unexposed | 465 | 27818.31 | 1 (ref) |
| yes |  | 82 | 947.68 | 4.55 (3.56-5.81) |
| no | 65 to 75 | 935 | 15952.65 | 1 (ref) |
| yes |  | 64 | 431.51 | 2.14 (1.65-2.76) |
| no | 75 to 85 | 1109 | 8640.61 | 1 (ref) |
| yes |  | 34 | 130.74 | 1.67 (1.19-2.36) |
| no | 85 to 150 | 577 | 3251.53 | 1 (ref) |
| yes |  | 8 | 18.72 | 1.81 (0.9-3.64) |
| no | 50 to 65 | exposed: < 90 days | 80 | 132.04 | 1 (ref) |
| yes |  | 21 | 15.14 | 1.99 (1.23-3.22) |
| no | 65 to 75 | 141 | 93.76 | 1 (ref) |
| yes |  | 31 | 8.39 | 2.06 (1.4-3.04) |
| no | 75 to 85 | 206 | 81.54 | 1 (ref) |
| yes |  | <11 | 3.13 | 0.71 (0.33-1.5) |
| no | 85 to 150 | 120 | 59.31 | 1 (ref) |
| yes |  | <5 | 0.59 | 1.78 (0.56-5.62) |
| no | 50 to 65 | exposed: ≥ 90 days | 35 | 339.7 | 1 (ref) |
| yes |  | 28 | 44.32 | 5.33 (3.24-8.76) |
| no | 65 to 75 | 35 | 191.96 | 1 (ref) |
| yes |  | 13 | 18.66 | 3.08 (1.63-5.83) |
| no | 75 to 85 | 49 | 165.66 | 1 (ref) |
| yes |  | <11 | 6.63 | 1.57 (0.56-4.35) |
| no | 85 to 150 | 38 | 129.45 | 1 (ref) |
| yes |  | <5 | 1.3 | 1.85 (0.25-13.56) |
| Renal insufficiency | no | 50 to 65 | unexposed | 537 | 28609.22 | 1 (ref) |
| yes |  | 10 | 156.77 | 2.7 (1.44-5.05) |
| no | 65 to 75 | 967 | 16167.71 | 1 (ref) |
| yes |  | 32 | 216.45 | 1.93 (1.35-2.76) |
| no | 75 to 85 | 1084 | 8543.75 | 1 (ref) |
| yes |  | 59 | 227.6 | 1.61 (1.24-2.1) |
| no | 85 to 150 | 547 | 3161.79 | 1 (ref) |
| yes |  | 38 | 108.46 | 1.54 (1.1-2.14) |
| no | 50 to 65 | exposed: < 90 days | 101 | 145.86 | 1 (ref) |
| yes |  | 0 | 1.32 | 0 (0-0) |
| no | 65 to 75 | 167 | 99.86 | 1 (ref) |
| yes |  | <8 | 2.29 | 1.05 (0.43-2.55) |
| no | 75 to 85 | 203 | 81.52 | 1 (ref) |
| yes |  | <14 | 3.16 | 0.99 (0.52-1.87) |
| no | 85 to 150 | 117 | 57.37 | 1 (ref) |
| yes |  | <7 | 2.53 | 0.86 (0.38-1.96) |
| no | 50 to 65 | exposed: ≥ 90 days | 63 | 380.86 | 1 (ref) |
| yes |  | 0 | 3.15 | 0 (0-0) |
| no | 65 to 75 | 45 | 206.64 | 1 (ref) |
| yes |  | <8 | 3.97 | 2.74 (0.85-8.83) |
| no | 75 to 85 | 49 | 166.91 | 1 (ref) |
| yes |  | <14 | 5.38 | 1.99 (0.72-5.51) |
| no | 85 to 150 | 38 | 126.45 | 1 (ref) |
| yes |  | <7 | 4.29 | 0.56 (0.08-4.09) |
| Chronic hepatic diseases | no | 50 to 65 | unexposed | 522 | 28548.02 | 1 (ref) |
| yes |  | 25 | 217.97 | 5.96 (3.98-8.93) |
| no | 65 to 75 | 975 | 16239.64 | 1 (ref) |
| yes |  | 24 | 144.52 | 2.71 (1.81-4.07) |
| no | 75 to 85 | 1136 | 8711.88 | 1 (ref) |
| yes |  | 7 | 59.47 | 0.9 (0.43-1.89) |
| no | 85 to 150 | 583 | 3255.9 | 1 (ref) |
| yes |  | <5 | 14.35 | 0.7 (0.18-2.82) |
| no | 50 to 65 | exposed: < 90 days | 96 | 144.26 | 1 (ref) |
| yes |  | 5 | 2.92 | 2.32 (0.94-5.72) |
| no | 65 to 75 | 167 | 100.01 | 1 (ref) |
| yes |  | <7 | 2.13 | 1.31 (0.54-3.19) |
| no | 75 to 85 | 210 | 83.72 | 1 (ref) |
| yes |  | <5 | 0.95 | 1.18 (0.38-3.67) |
| no | 85 to 150 | 119 | 59.59 | 1 (ref) |
| yes |  | <5 | 0.31 | 5.81 (2.18-15.52) |
| no | 50 to 65 | exposed: ≥ 90 days | 56 | 375.85 | 1 (ref) |
| yes |  | 7 | 8.16 | 5.25 (2.39-11.51) |
| no | 65 to 75 | 46 | 206.36 | 1 (ref) |
| yes |  | <7 | 4.25 | 1.92 (0.47-7.92) |
| no | 75 to 85 | 52 | 170.54 | 1 (ref) |
| yes |  | <5 | 1.75 | 1.75 (0.24-12.66) |
| no | 85 to 150 | 39 | 130.12 | 1 (ref) |
| yes |  | 0 | 0.62 | 0 (0-0) |
| Lipid modifying drugs | no | 50 to 65 | unexposed | 381 | 22976.22 | 1 (ref) |
| yes |  | 166 | 5789.77 | 1.39 (1.15-1.68) |
| no | 65 to 75 | 538 | 10017.01 | 1 (ref) |
| yes |  | 461 | 6367.14 | 1.2 (1.06-1.36) |
| no | 75 to 85 | 584 | 4840.26 | 1 (ref) |
| yes |  | 559 | 3931.09 | 1.09 (0.97-1.22) |
| no | 85 to 150 | 356 | 2199.38 | 1 (ref) |
| yes |  | 229 | 1070.87 | 1.12 (0.94-1.33) |
| no | 50 to 65 | exposed: < 90 days | 72 | 113.9 | 1 (ref) |
| yes |  | 29 | 33.28 | 1.16 (0.76-1.79) |
| no | 65 to 75 | 92 | 59.88 | 1 (ref) |
| yes |  | 80 | 42.26 | 1.12 (0.83-1.51) |
| no | 75 to 85 | 112 | 45.74 | 1 (ref) |
| yes |  | 101 | 38.94 | 0.97 (0.74-1.27) |
| no | 85 to 150 | 75 | 41.38 | 1 (ref) |
| yes |  | 48 | 18.53 | 1.16 (0.8-1.67) |
| no | 50 to 65 | exposed: ≥ 90 days | 43 | 301.5 | 1 (ref) |
| yes |  | 20 | 82.51 | 1.46 (0.85-2.48) |
| no | 65 to 75 | 23 | 127.88 | 1 (ref) |
| yes |  | 25 | 82.74 | 1.57 (0.89-2.76) |
| no | 75 to 85 | 35 | 98.61 | 1 (ref) |
| yes |  | 18 | 73.68 | 0.65 (0.37-1.14) |
| no | 85 to 150 | 28 | 95.91 | 1 (ref) |
| yes |  | 11 | 34.84 | 0.91 (0.45-1.84) |
| Disposing neurological disorders | no | 50 to 65 | unexposed | 417 | 26128.79 | 1 (ref) |
| yes |  | 130 | 2637.2 | 3.12 (2.54-3.82) |
| no | 65 to 75 | 764 | 14703.74 | 1 (ref) |
| yes |  | 235 | 1680.42 | 2.42 (2.08-2.81) |
| no | 75 to 85 | 872 | 7738.4 | 1 (ref) |
| yes |  | 271 | 1032.95 | 2.12 (1.85-2.45) |
| no | 85 to 150 | 462 | 2890.2 | 1 (ref) |
| yes |  | 123 | 380.06 | 1.83 (1.49-2.24) |
| no | 50 to 65 | exposed: < 90 days | 70 | 127.03 | 1 (ref) |
| yes |  | 31 | 20.15 | 2.71 (1.77-4.14) |
| no | 65 to 75 | 134 | 85.13 | 1 (ref) |
| yes |  | 38 | 17.01 | 1.26 (0.87-1.8) |
| no | 75 to 85 | 151 | 68.66 | 1 (ref) |
| yes |  | 62 | 16.01 | 1.56 (1.16-2.1) |
| no | 85 to 150 | 100 | 50.72 | 1 (ref) |
| yes |  | <27 | 9.18 | 1.09 (0.69-1.71) |
| no | 50 to 65 | exposed: ≥ 90 days | 31 | 330.91 | 1 (ref) |
| yes |  | 32 | 53.1 | 6.53 (3.98-10.71) |
| no | 65 to 75 | 37 | 178.58 | 1 (ref) |
| yes |  | 11 | 32.04 | 1.49 (0.76-2.93) |
| no | 75 to 85 | 36 | 143.56 | 1 (ref) |
| yes |  | 17 | 28.73 | 2.15 (1.21-3.83) |
| no | 85 to 150 | 35 | 112.82 | 1 (ref) |
| yes |  | <27 | 17.93 | 0.63 (0.23-1.79) |
| Autoimmune disorders | no | 50 to 65 | unexposed | 545 | 28715.89 | 1 (ref) |
| yes |  | <5 | 50.1 | 2.96 (0.73-11.92) |
| no | 65 to 75 | 996 | 16354.22 | 1 (ref) |
| yes |  | <5 | 29.94 | 2.08 (0.67-6.45) |
| no | 75 to 85 | 1143 | 8755.35 | 1 (ref) |
| yes |  | 0 | 16 | 0 (0-0) |
| no | 85 to 150 | 585 | 3265.92 | 1 (ref) |
| yes |  | 0 | 4.33 | 0 (0-0) |
| no | 50 to 65 | exposed: < 90 days | 101 | 146.88 | 1 (ref) |
| yes |  | 0 | 0.3 | 0 (0-0) |
| no | 65 to 75 | 172 | 101.92 | 1 (ref) |
| yes |  | 0 | 0.23 | 0 (0-0) |
| no | 75 to 85 | 212 | 84.47 | 1 (ref) |
| yes |  | <5 | 0.21 | 2.26 (0.31-16.3) |
| no | 85 to 150 | 123 | 59.81 | 1 (ref) |
| yes |  | 0 | 0.09 | 0 (0-0) |
| no | 50 to 65 | exposed: ≥ 90 days | 63 | 383.33 | 1 (ref) |
| yes |  | 0 | 0.68 | 0 (0-0) |
| no | 65 to 75 | 48 | 210.17 | 1 (ref) |
| yes |  | 0 | 0.45 | 0 (0-0) |
| no | 75 to 85 | 53 | 171.94 | 1 (ref) |
| yes |  | 0 | 0.35 | 0 (0-0) |
| no | 85 to 150 | 39 | 130.54 | 1 (ref) |
| yes |  | 0 | 0.21 | 0 (0-0) |
| Anticoagulation | no | 50 to 65 | unexposed | 398 | 25895.84 | 1 (ref) |
| yes |  | 149 | 2870.15 | 2.46 (2.02-3) |
| no | 65 to 75 | 554 | 12245.23 | 1 (ref) |
| yes |  | 445 | 4138.93 | 1.93 (1.7-2.2) |
| no | 75 to 85 | 504 | 5315.64 | 1 (ref) |
| yes |  | 639 | 3455.72 | 1.67 (1.49-1.88) |
| no | 85 to 150 | 265 | 1855.72 | 1 (ref) |
| yes |  | 320 | 1414.53 | 1.39 (1.18-1.63) |
| no | 50 to 65 | exposed: < 90 days | 83 | 127.86 | 1 (ref) |
| yes |  | 18 | 19.1 | 1.12 (0.68-1.87) |
| no | 65 to 75 | 104 | 71.13 | 1 (ref) |
| yes |  | 68 | 30.54 | 1.25 (0.92-1.7) |
| no | 75 to 85 | 105 | 46.33 | 1 (ref) |
| yes |  | 107 | 37.88 | 1.06 (0.81-1.39) |
| no | 85 to 150 | 67 | 31.64 | 1 (ref) |
| yes |  | 56 | 27.85 | 0.81 (0.57-1.16) |
| no | 50 to 65 | exposed: ≥ 90 days | 52 | 337.25 | 1 (ref) |
| yes |  | 11 | 46.99 | 1.17 (0.61-2.25) |
| no | 65 to 75 | 25 | 150.05 | 1 (ref) |
| yes |  | 23 | 61.03 | 1.88 (1.07-3.31) |
| no | 75 to 85 | 30 | 97.68 | 1 (ref) |
| yes |  | 24 | 75.08 | 0.9 (0.53-1.54) |
| no | 85 to 150 | 19 | 72.37 | 1 (ref) |
| yes |  | 20 | 58.79 | 1.15 (0.61-2.15) |
| Glucocorticoids | no | 50 to 65 | unexposed | 539 | 28557.8 | 1 (ref) |
| yes |  | 8 | 208.19 | 1.89 (0.94-3.8) |
| no | 65 to 75 | 987 | 16098.83 | 1 (ref) |
| yes |  | 12 | 285.33 | 0.68 (0.39-1.21) |
| no | 75 to 85 | 1125 | 8479.8 | 1 (ref) |
| yes |  | 18 | 291.55 | 0.48 (0.3-0.76) |
| no | 85 to 150 | 574 | 3158.95 | 1 (ref) |
| yes |  | 11 | 111.3 | 0.54 (0.3-0.98) |
| no | 50 to 65 | exposed: < 90 days | 100 | 145.51 | 1 (ref) |
| yes |  | <5 | 1.52 | 1.02 (0.14-7.31) |
| no | 65 to 75 | 170 | 99.32 | 1 (ref) |
| yes |  | <5 | 2.44 | 0.25 (0.04-1.8) |
| no | 75 to 85 | 206 | 80.65 | 1 (ref) |
| yes |  | <8 | 3.59 | 0.57 (0.24-1.39) |
| no | 85 to 150 | 121 | 57.49 | 1 (ref) |
| yes |  | <5 | 2.2 | 0.43 (0.11-1.76) |
| no | 50 to 65 | exposed: ≥ 90 days | 62 | 380.25 | 1 (ref) |
| yes |  | <5 | 3.91 | 1.52 (0.21-10.97) |
| no | 65 to 75 | 48 | 205.48 | 1 (ref) |
| yes |  | <5 | 5.52 | 0.8 (0.11-5.8) |
| no | 75 to 85 | 52 | 164.86 | 1 (ref) |
| yes |  | <8 | 7.87 | 1.24 (0.39-3.96) |
| no | 85 to 150 | 39 | 125.93 | 1 (ref) |
| yes |  | 0 | 5.03 | 0 (0-0) |
| Conditions predisposing for head trauma | no | 50 to 65 | unexposed | 514 | 28629.58 | 1 (ref) |
| yes |  | 33 | 136.41 | 13.29 (9.34-18.91) |
| no | 65 to 75 | 932 | 16273.37 | 1 (ref) |
| yes |  | 67 | 110.79 | 9.68 (7.55-12.41) |
| no | 75 to 85 | 1050 | 8658.26 | 1 (ref) |
| yes |  | 93 | 113.09 | 6.54 (5.28-8.09) |
| no | 85 to 150 | 518 | 3192.65 | 1 (ref) |
| yes |  | 67 | 77.6 | 5.36 (4.14-6.92) |
| no | 50 to 65 | exposed: < 90 days | 94 | 144.86 | 1 (ref) |
| yes |  | 7 | 2.12 | 4.65 (2.15-10.08) |
| no | 65 to 75 | 155 | 98.76 | 1 (ref) |
| yes |  | 16 | 2.96 | 3.16 (1.89-5.3) |
| no | 75 to 85 | 175 | 79.34 | 1 (ref) |
| yes |  | 33 | 4.74 | 2.99 (2.06-4.34) |
| no | 85 to 150 | 99 | 54.16 | 1 (ref) |
| yes |  | <28 | 5.23 | 2.43 (1.55-3.8) |
| no | 50 to 65 | exposed: ≥ 90 days | 58 | 378.29 | 1 (ref) |
| yes |  | 5 | 5.92 | 5.05 (2.03-12.57) |
| no | 65 to 75 | 43 | 204.61 | 1 (ref) |
| yes |  | 6 | 6.43 | 4.07 (1.74-9.55) |
| no | 75 to 85 | 46 | 162.01 | 1 (ref) |
| yes |  | 12 | 10.87 | 3.79 (2-7.15) |
| no | 85 to 150 | 35 | 118.51 | 1 (ref) |
| yes |  | <28 | 12.74 | 1.04 (0.37-2.93) |
| NSAID’s | no | 50 to 65 | unexposed | 511 | 27735.97 | 1 (ref) |
| yes |  | 36 | 1030.02 | 1.95 (1.39-2.73) |
| no | 65 to 75 | 956 | 15787.9 | 1 (ref) |
| yes |  | 43 | 596.26 | 1.24 (0.92-1.69) |
| no | 75 to 85 | 1111 | 8477.27 | 1 (ref) |
| yes |  | 32 | 294.08 | 0.89 (0.63-1.26) |
| no | 85 to 150 | 566 | 3186.69 | 1 (ref) |
| yes |  | 19 | 83.56 | 1.33 (0.84-2.1) |
| no | 50 to 65 | exposed: < 90 days | 98 | 138.59 | 1 (ref) |
| yes |  | <5 | 7.28 | 0.63 (0.2-2) |
| no | 65 to 75 | 163 | 95.88 | 1 (ref) |
| yes |  | <10 | 4.61 | 1.31 (0.67-2.58) |
| no | 75 to 85 | 207 | 80.38 | 1 (ref) |
| yes |  | <7 | 3.31 | 0.69 (0.28-1.67) |
| no | 85 to 150 | 117 | 57.79 | 1 (ref) |
| yes |  | <6 | 1.78 | 1.86 (0.82-4.24) |
| no | 50 to 65 | exposed: ≥ 90 days | 59 | 367.4 | 1 (ref) |
| yes |  | <5 | 17.93 | 1.44 (0.52-3.95) |
| no | 65 to 75 | 47 | 201.8 | 1 (ref) |
| yes |  | <10 | 10.47 | 0.43 (0.06-3.12) |
| no | 75 to 85 | 52 | 166.21 | 1 (ref) |
| yes |  | <7 | 7.07 | 0.93 (0.23-3.83) |
| no | 85 to 150 | 39 | 127.55 | 1 (ref) |
| yes |  | 0 | 3.52 | 0 (0-0) |
| Traumatic intracranial hemorrhage | no | 50 to 65 | unexposed | 497 | 28737.7 | 1 (ref) |
| yes |  | 50 | 28.29 | 92.99 (68.67-125.91) |
| no | 65 to 75 | 925 | 16365.27 | 1 (ref) |
| yes |  | 74 | 18.88 | 58.92 (46.04-75.4) |
| no | 75 to 85 | 1033 | 8758.33 | 1 (ref) |
| yes |  | 110 | 13.02 | 63.07 (51.08-77.89) |
| no | 85 to 150 | 531 | 3263.56 | 1 (ref) |
| yes |  | 54 | 6.7 | 47.13 (34.99-63.47) |
| no | 50 to 65 | exposed: < 90 days | 74 | 145.89 | 1 (ref) |
| yes |  | 27 | 1.29 | 35.58 (22.69-55.79) |
| no | 65 to 75 | 125 | 101.09 | 1 (ref) |
| yes |  | 47 | 1.06 | 29.05 (20.54-41.09) |
| no | 75 to 85 | 175 | 83.84 | 1 (ref) |
| yes |  | 38 | 0.84 | 18.51 (12.86-26.63) |
| no | 85 to 150 | 108 | 59.33 | 1 (ref) |
| yes |  | 15 | 0.57 | 11.99 (6.88-20.87) |
| no | 50 to 65 | exposed: ≥ 90 days | 48 | 380.75 | 1 (ref) |
| yes |  | 15 | 3.26 | 31.85 (17.73-57.22) |
| no | 65 to 75 | 40 | 208.75 | 1 (ref) |
| yes |  | 8 | 1.87 | 17.96 (8.36-38.57) |
| no | 75 to 85 | 47 | 170.97 | 1 (ref) |
| yes |  | 6 | 1.32 | 14.21 (6.04-33.42) |
| no | 85 to 150 | 32 | 129.86 | 1 (ref) |
| yes |  | 7 | 0.89 | 28.41 (12.37-65.27) |
| Acute subdural haematoma | no | 50 to 65 | unexposed | 521 | 28763.82 | 1 (ref) |
| yes |  | 26 | 2.17 | 530.29 (343.15-819.5) |
| no | 65 to 75 | 953 | 16381.97 | 1 (ref) |
| yes |  | 46 | 2.18 | 295.61 (211.59-412.99) |
| no | 75 to 85 | 1065 | 8769.5 | 1 (ref) |
| yes |  | 78 | 1.85 | 286.11 (215.56-379.75) |
| no | 85 to 150 | 551 | 3269.21 | 1 (ref) |
| yes |  | 34 | 1.05 | 160.65 (107.13-240.92) |
| no | 50 to 65 | exposed: < 90 days | 90 | 147.01 | 1 (ref) |
| yes |  | 11 | 0.17 | 86.63 (44.31-169.38) |
| no | 65 to 75 | 155 | 101.95 | 1 (ref) |
| yes |  | <19 | 0.19 | 44.41 (25.71-76.71) |
| no | 75 to 85 | 205 | 84.54 | 1 (ref) |
| yes |  | <11 | 0.14 | 20.54 (9.71-43.43) |
| no | 85 to 150 | 113 | 59.79 | 1 (ref) |
| yes |  | 10 | 0.12 | 38.07 (19.18-75.55) |
| no | 50 to 65 | exposed: ≥ 90 days | 58 | 383.66 | 1 (ref) |
| yes |  | 5 | 0.36 | 79 (30.93-201.77) |
| no | 65 to 75 | 46 | 210.41 | 1 (ref) |
| yes |  | <19 | 0.21 | 35.01 (8.3-147.71) |
| no | 75 to 85 | 50 | 172.13 | 1 (ref) |
| yes |  | <11 | 0.16 | 54.5 (16.54-179.59) |
| no | 85 to 150 | 33 | 130.62 | 1 (ref) |
| yes |  | 6 | 0.13 | 145.03 (56.79-370.37) |

Reference for comparison is unexposed. PYRS: patient years. NSAID’s: non-steroid anti-inflammatory drugs.
